# Supplementary material
Source: PubMed Central journal article supplement (PMC4356661)
Supplement: TAN572953_Supp_Material.pdf [file TAN572953_Supp_Material.pdf]

**Supplement Table.** Adverse event summary

| n (%)                                             | Patients with RRMS           | HCs    |
|---------------------------------------------------|------------------------------|--------|
|                                                   | n = 23                       | n = 15 |
| ≥ 1 AE                                            | 22 (96)                      | 8 (53) |
| ≥ 1 treatment-related AE <sup>a</sup>             | 16 (70)                      | 0      |
| ≥ 1 severe AE <sup>b</sup>                        | 4 (17)                       | 0      |
| ≥ 1 serious AE                                    | 1 (4)                        | 0      |
| ≥ 1 AE resulting in discontinuation of study drug | 1 (4) <sup>c</sup>           | 0      |
| Most common (≥3) TEAEs, n (%) <sup>d</sup>        | Patients with RRMS<br>n = 23 |        |
| Influenza-like illness                            | 9 (39)                       |        |
| Injection-site reaction                           | 8 (35)                       |        |
| Multiple sclerosis relapse                        | 5 (22)                       |        |
| Fatigue                                           | 4 (17)                       |        |
| Injection-site pain                               | 4 (17)                       |        |
| Nasopharyngitis                                   | 4 (17)                       |        |
| Headache                                          | 3 (13)                       |        |
| Migraine                                          | 3 (13)                       |        |
| Muscular weakness                                 | 3 (13)                       |        |
| Nausea                                            | 3 (13)                       |        |

AE; adverse event; HC, healthy control; RRMS, relapsing-remitting multiple sclerosis; TEAE, treatment-emergent AE  
<sup>a</sup>Relationship = possible, probable, missing. <sup>b</sup>Includes missing severity. <sup>c</sup>Action taken = medication permanently stopped.  
<sup>d</sup>No TEAE was seen in ≥3 subjects in the HC group.

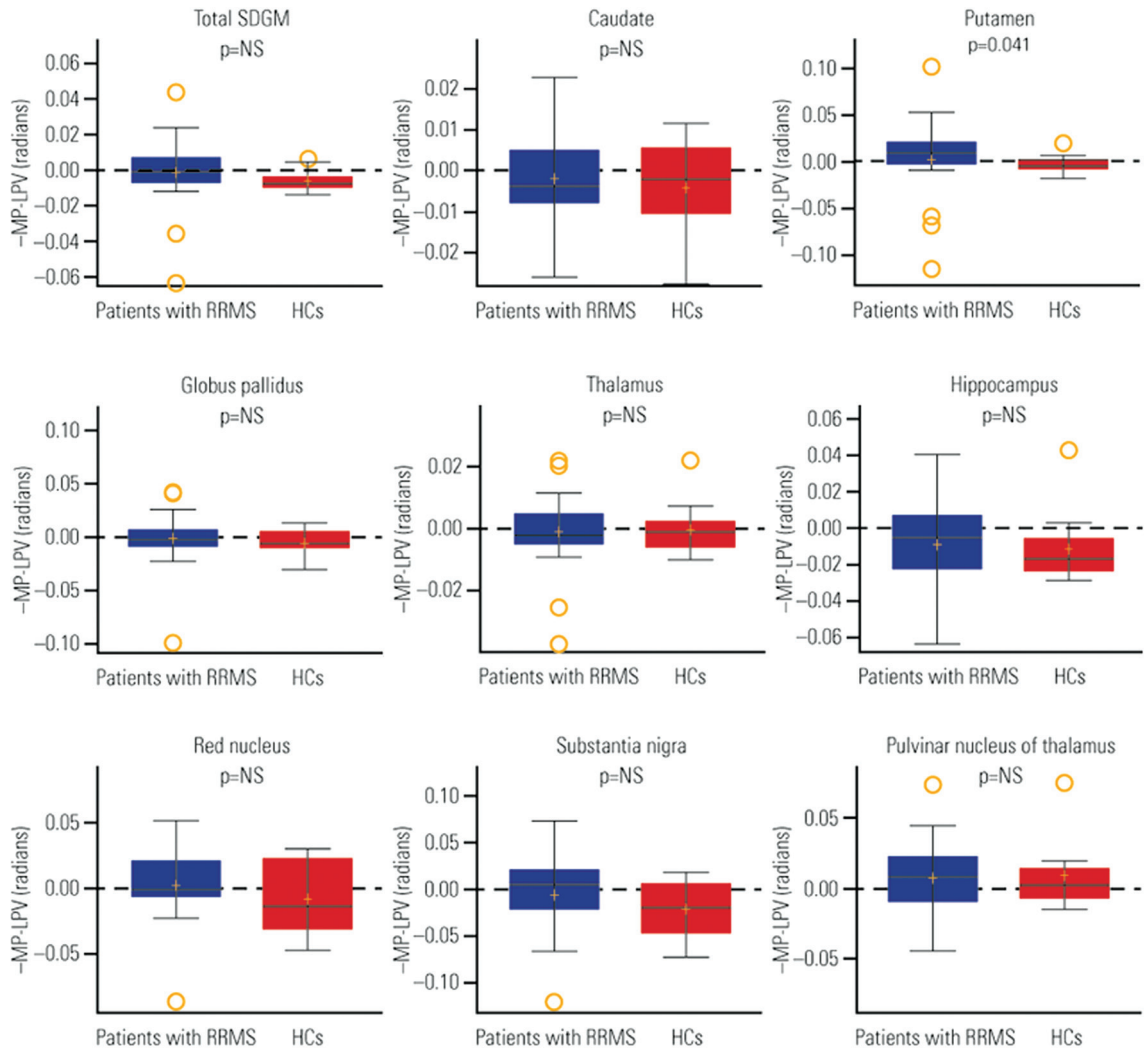

**Supplement Figure 1**
